# Supplementary material for: Discovery of 12O—A Novel Oral Multi-Kinase Inhibitor for the Treatment of Solid Tumor
Source: MDPI journal article supplement (doi:10.3390/molecules25215199), 2020-11-09

Supporting Information

# **Novel oral multi-kinase inhibitor of CDKs and FLT3 for treatment of solid tumor**

**Yan Fan<sup>1,#</sup>, Zhi Huang<sup>1,#</sup>, Xiaoshuang Wang<sup>1</sup>, Yakun Ma<sup>1</sup>, Yongtao Li<sup>1</sup>, Shengyong Yang<sup>2</sup>  
and Yi Shi<sup>1,\*</sup>**

## Table of Content

|                                                                                                                    |    |
|--------------------------------------------------------------------------------------------------------------------|----|
| Figure S1. Strategy of designing novel inhibitors.....                                                             | 4  |
| Figure S2. The inhibition curve of 12O against CDKs and FLT3. ....                                                 | 5  |
| Figure S3. 12O effectively inhibited the proliferation of SKOV3 cells as determined by colony formation assay..... | 6  |
| Figure S4. <sup>1</sup> H and <sup>13</sup> C spectra of compound 12A.....                                         | 7  |
| Figure S5. <sup>1</sup> H and <sup>13</sup> C spectra of compound 12B.....                                         | 8  |
| Figure S6. <sup>1</sup> H and <sup>13</sup> C spectra of compound 12C.....                                         | 9  |
| Figure S7. <sup>1</sup> H and <sup>13</sup> C spectra of compound 12D.....                                         | 10 |
| Figure S8. <sup>1</sup> H and <sup>13</sup> C spectra of compound 12E.....                                         | 11 |
| Figure S9. <sup>1</sup> H and <sup>13</sup> C spectra of compound 12F.....                                         | 12 |
| Figure S10. <sup>1</sup> H and <sup>13</sup> C spectra of compound 12G.....                                        | 13 |
| Figure S11. <sup>1</sup> H and <sup>13</sup> C spectra of compound 12H.....                                        | 14 |
| Figure S12. <sup>1</sup> H and <sup>13</sup> C spectra of compound 12I.....                                        | 15 |
| Figure S13. <sup>1</sup> H and <sup>13</sup> C spectra of compound 12J.....                                        | 16 |
| Figure S14. <sup>1</sup> H and <sup>13</sup> C spectra of compound 12K.....                                        | 17 |
| Figure S15. <sup>1</sup> H and <sup>13</sup> C spectra of compound 12L.....                                        | 18 |

|                                                                            |    |
|----------------------------------------------------------------------------|----|
| Figure S16. $^1\text{H}$ and $^{13}\text{C}$ spectra of compound 12M.....  | 19 |
| Figure S17. $^1\text{H}$ and $^{13}\text{C}$ spectra of compound 12N. .... | 20 |
| Figure S18. $^1\text{H}$ and $^{13}\text{C}$ spectra of compound 12O.....  | 21 |
| Figure S19. $^1\text{H}$ and $^{13}\text{C}$ spectra of compound 12P.....  | 22 |

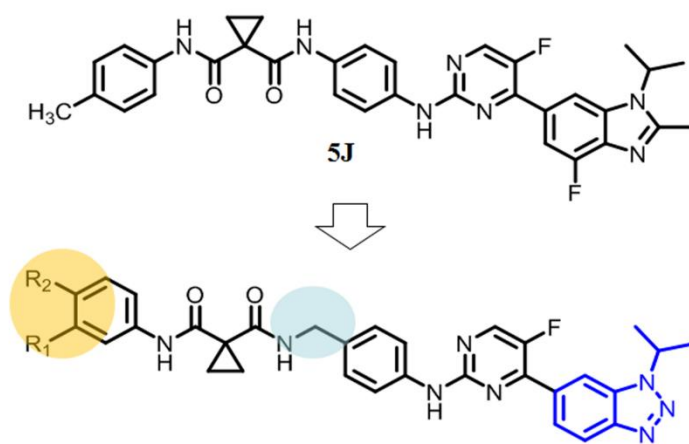

**Figure S1.** Strategy of designing novel inhibitors.

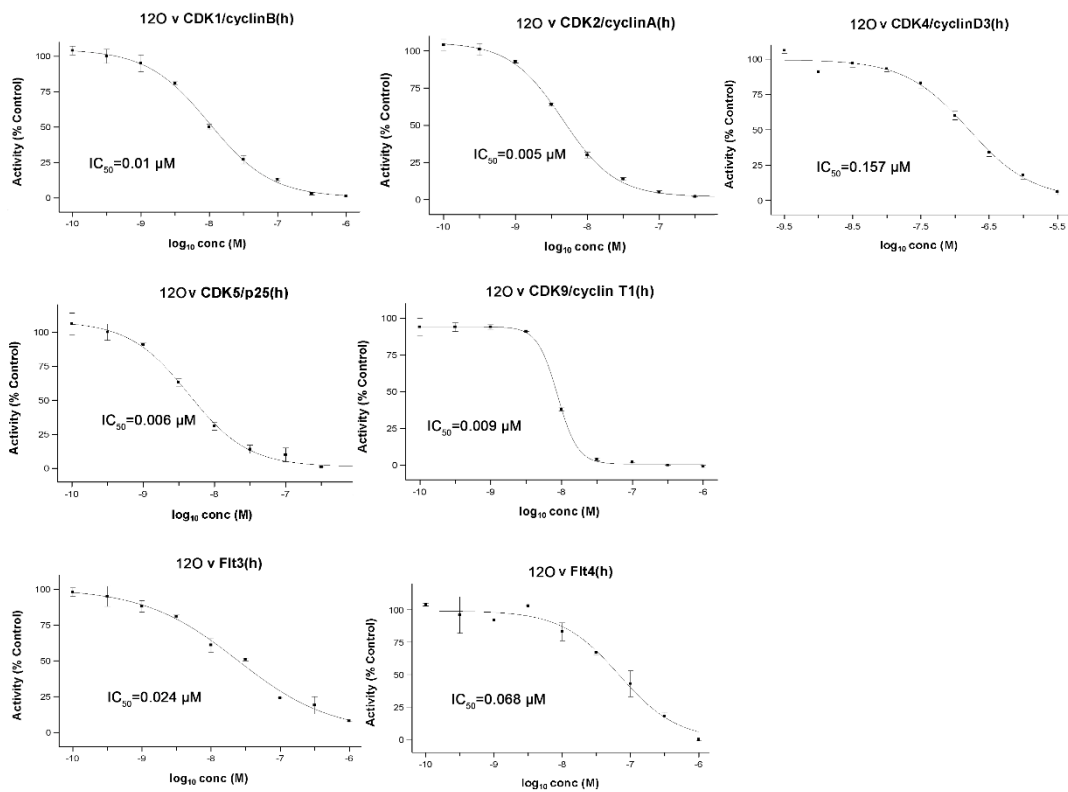

**Figure S2.** The inhibition curve of 12O against CDKs and FLT3.

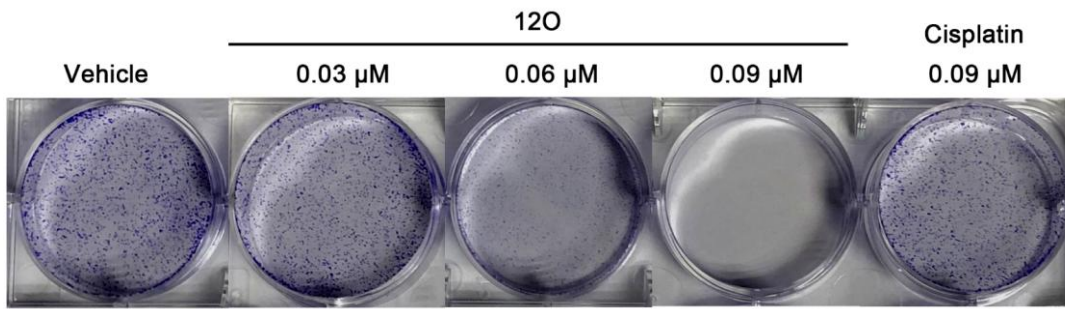

Figure S3. 12O effectively inhibited the proliferation of SKOV3 cells as determined by colony formation assay.

Figure S4.  $^1\text{H}$  and  $^{13}\text{C}$  spectra of compound 12A.

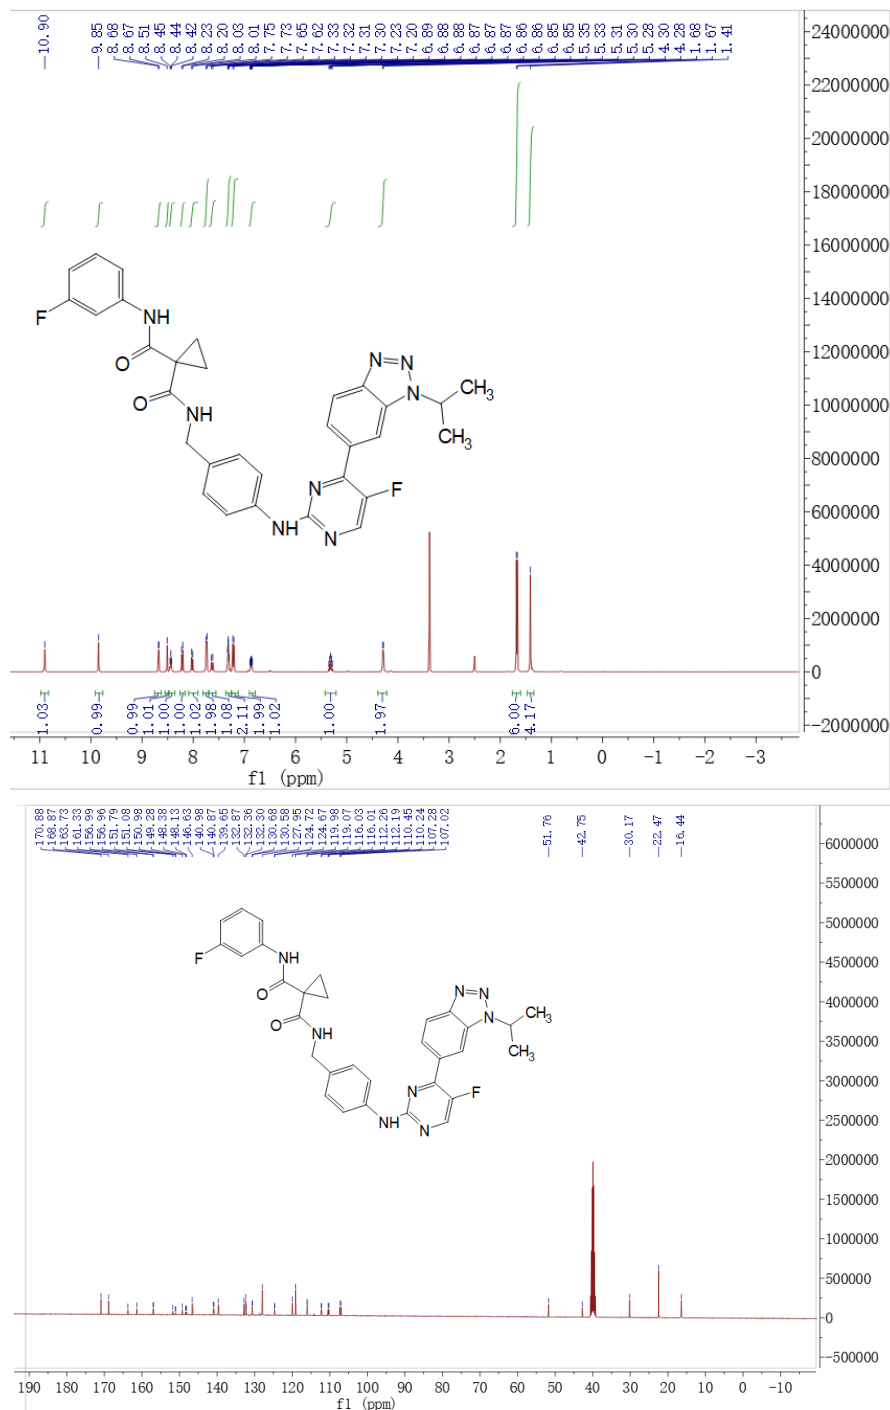

Figure S5. <sup>1</sup>H and <sup>13</sup>C spectra of compound 12B.

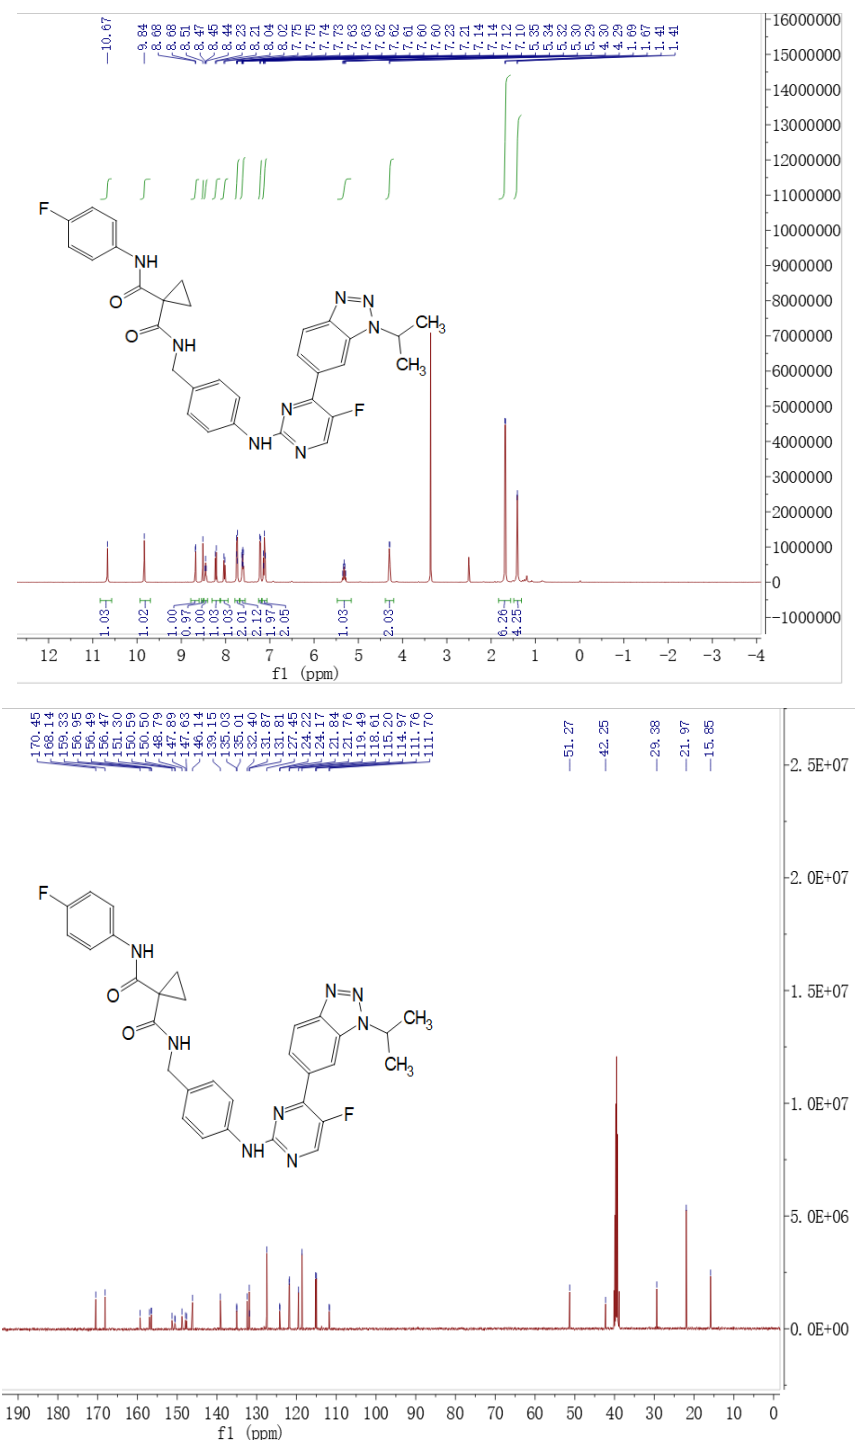



Figure S6.  $^1\text{H}$  and  $^{13}\text{C}$  spectra of compound 12C.

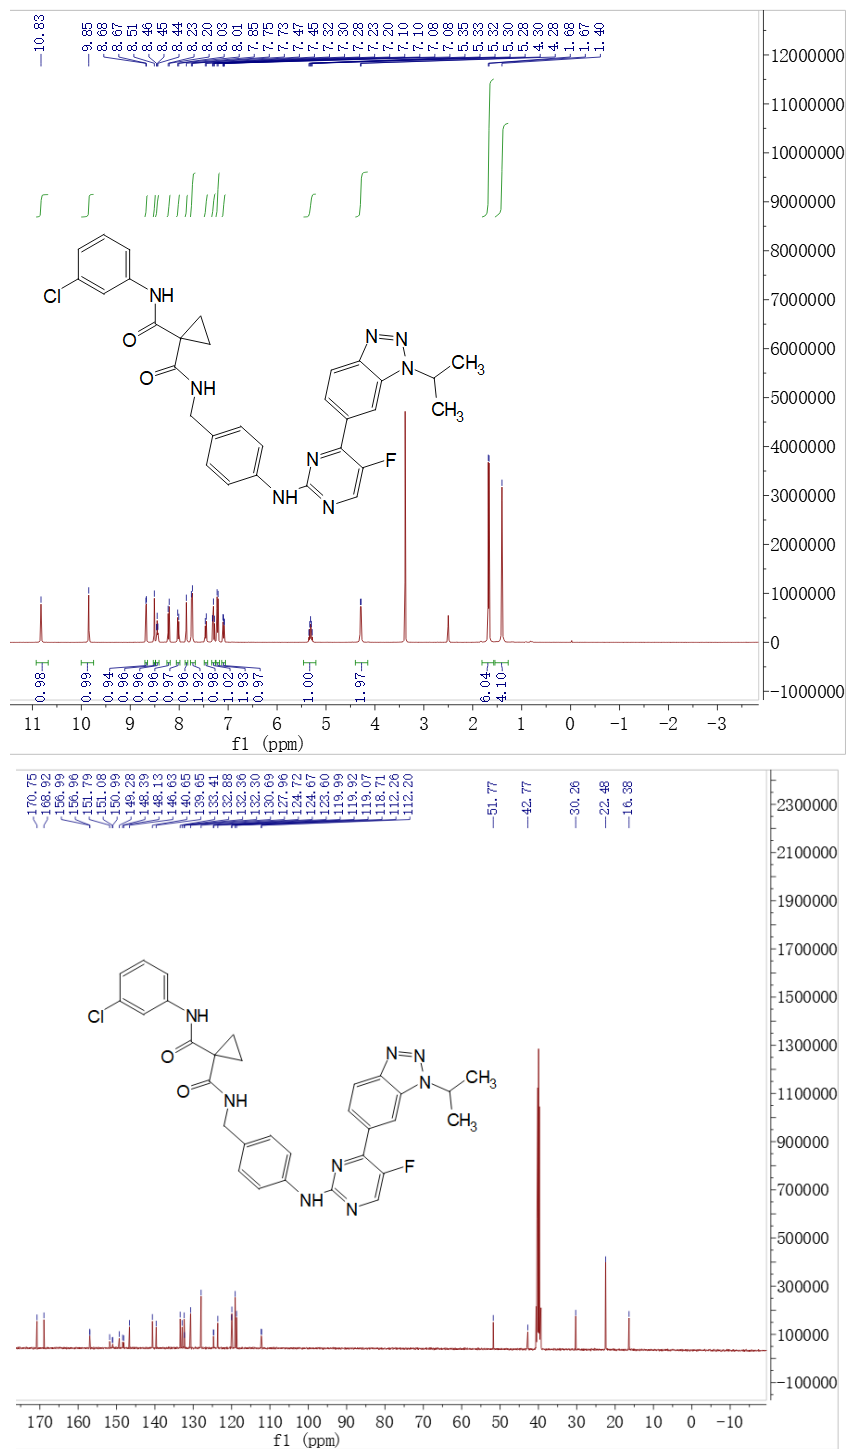

Figure S7.  $^1\text{H}$  and  $^{13}\text{C}$  spectra of compound 12D.

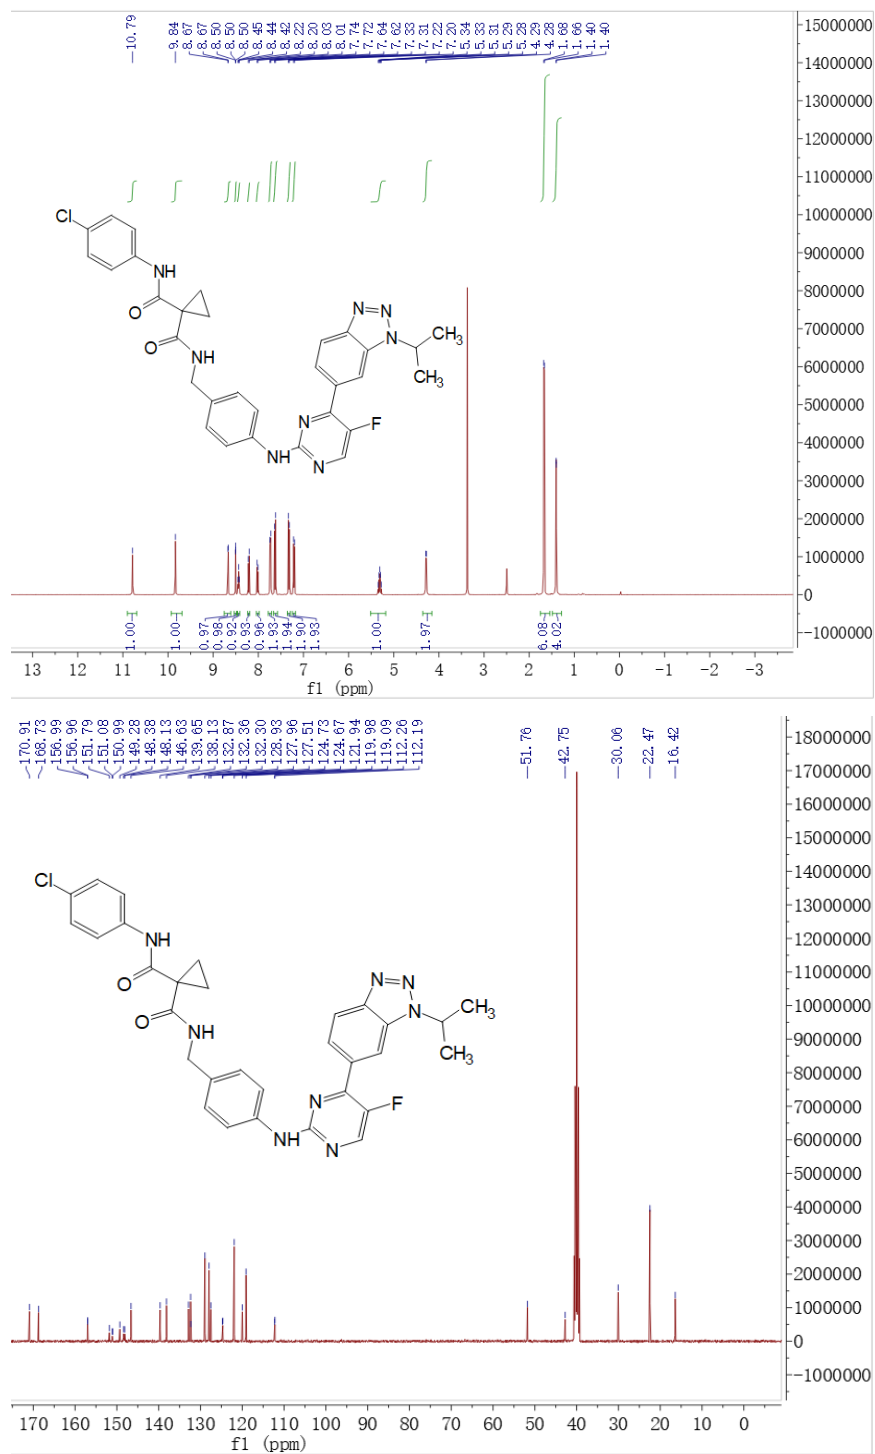

Figure S8.  $^1\text{H}$  and  $^{13}\text{C}$  spectra of compound 12E.

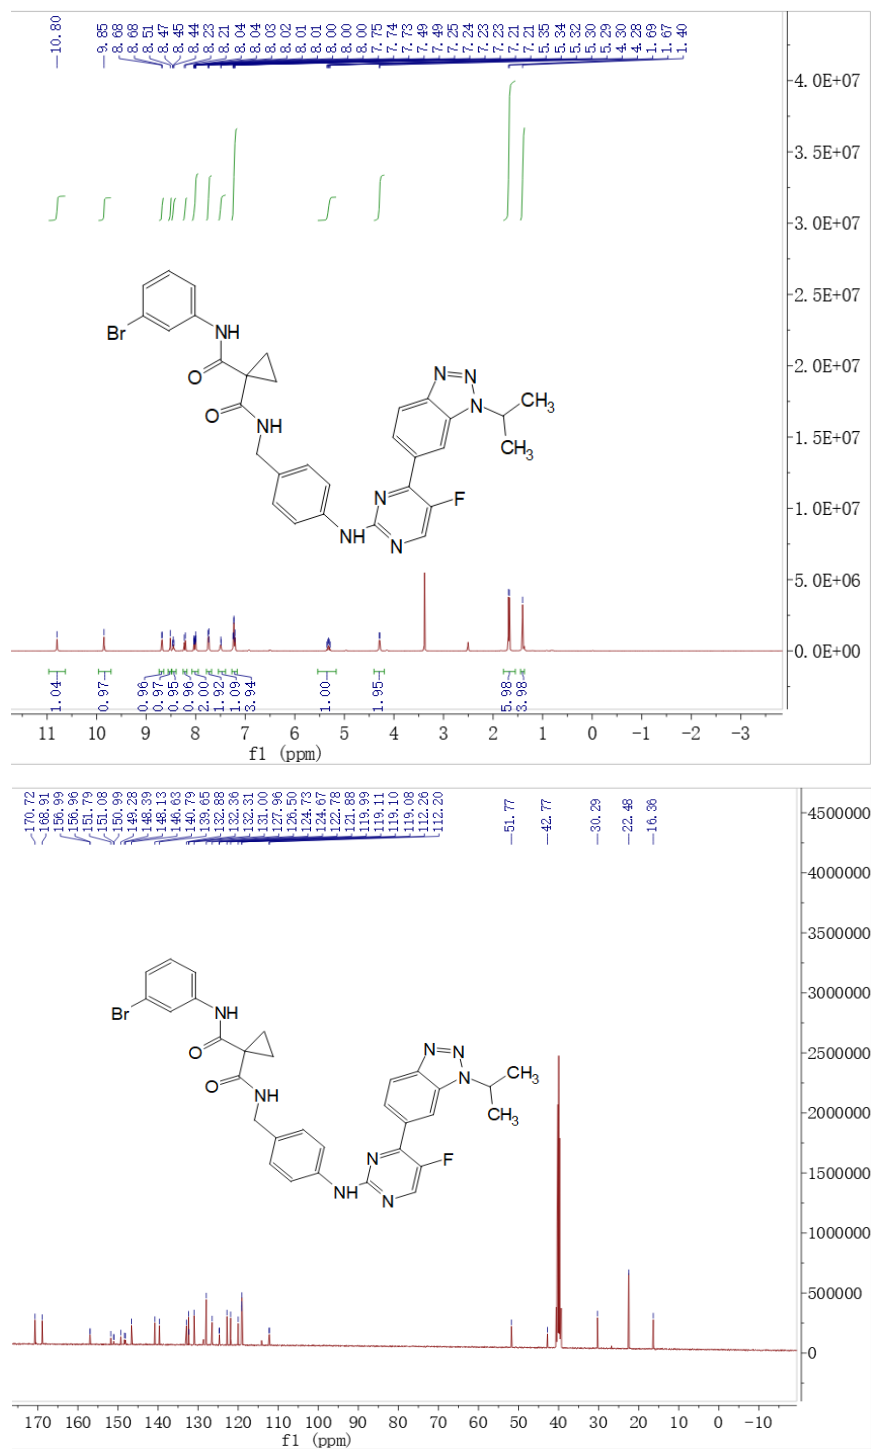

Figure S9.  $^1\text{H}$  and  $^{13}\text{C}$  spectra of compound 12F.

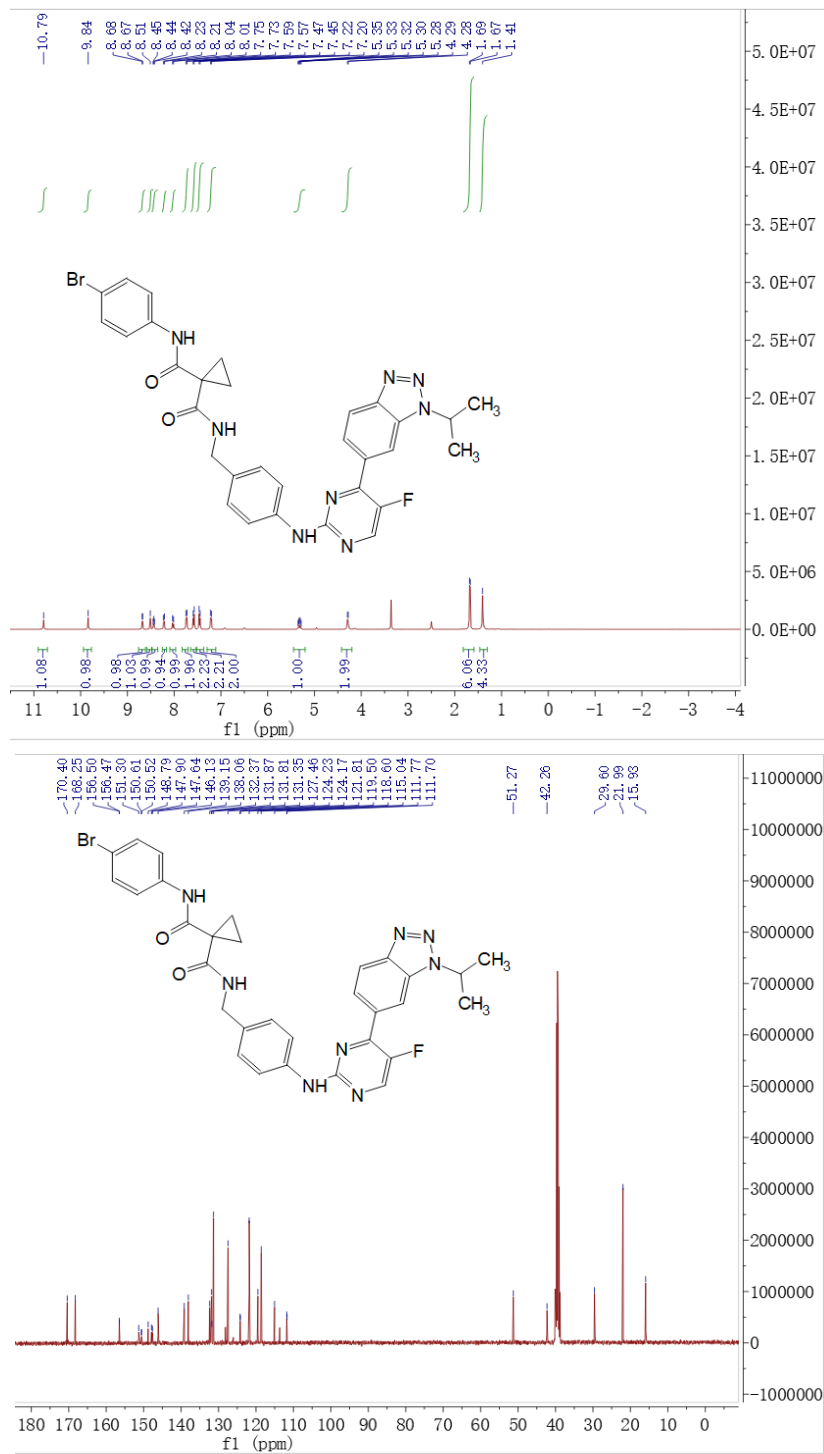

Figure S10.  $^1\text{H}$  and  $^{13}\text{C}$  spectra of compound 12G.

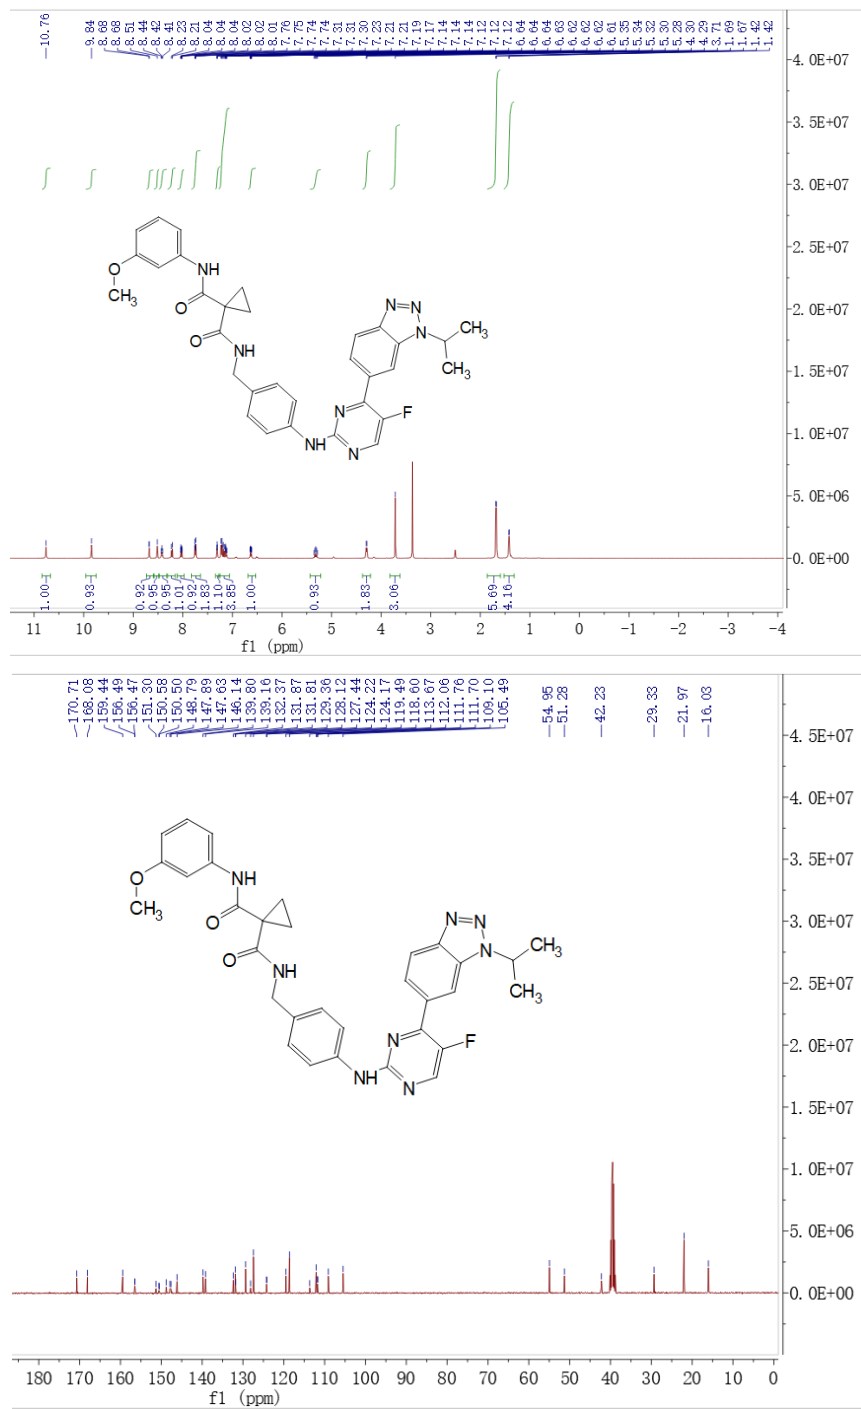

Figure S11.  $^1\text{H}$  and  $^{13}\text{C}$  spectra of compound 12H.

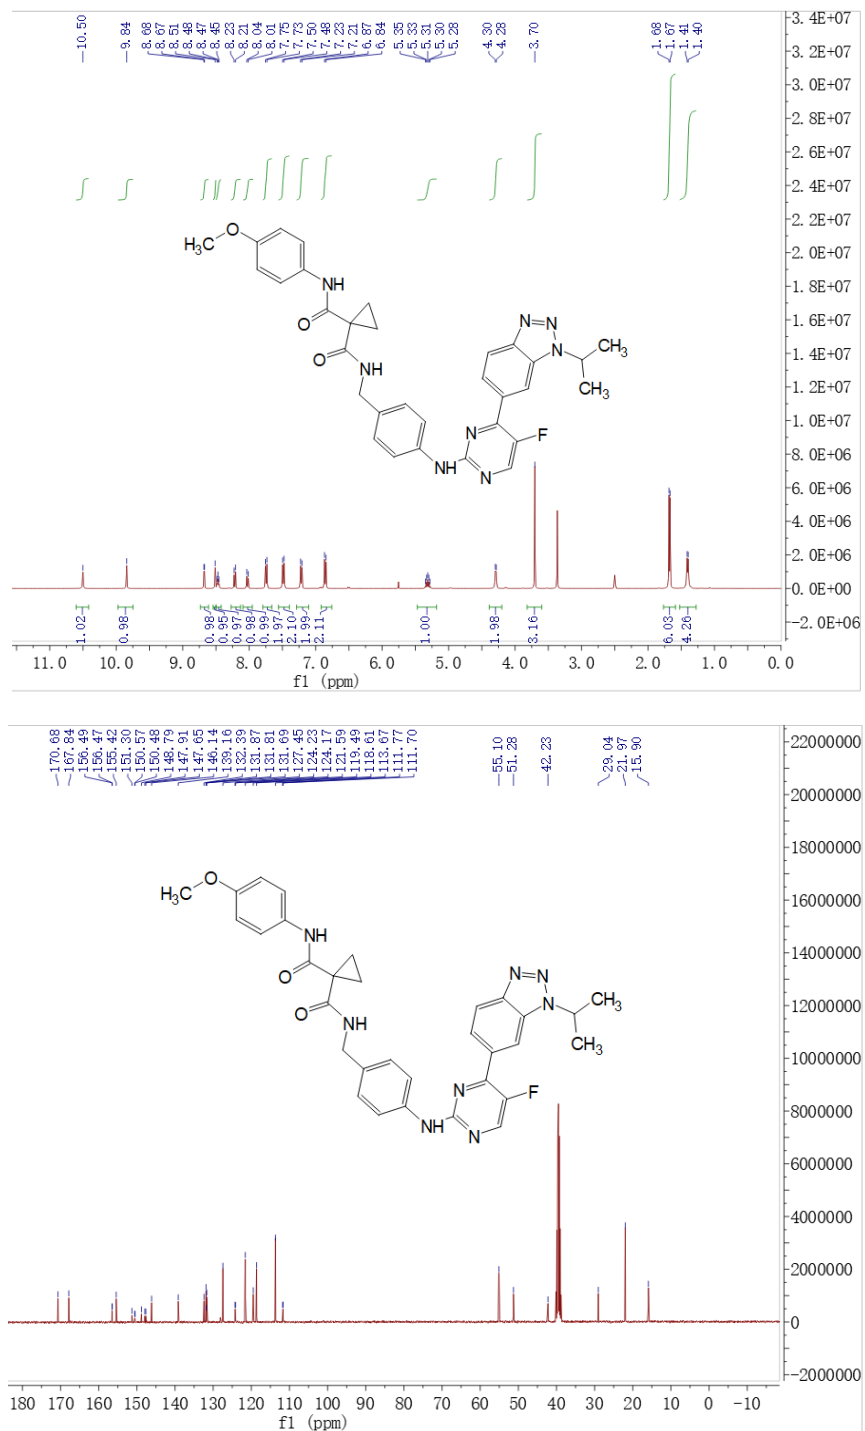

Figure S12.  $^1\text{H}$  and  $^{13}\text{C}$  spectra of compound 12I.

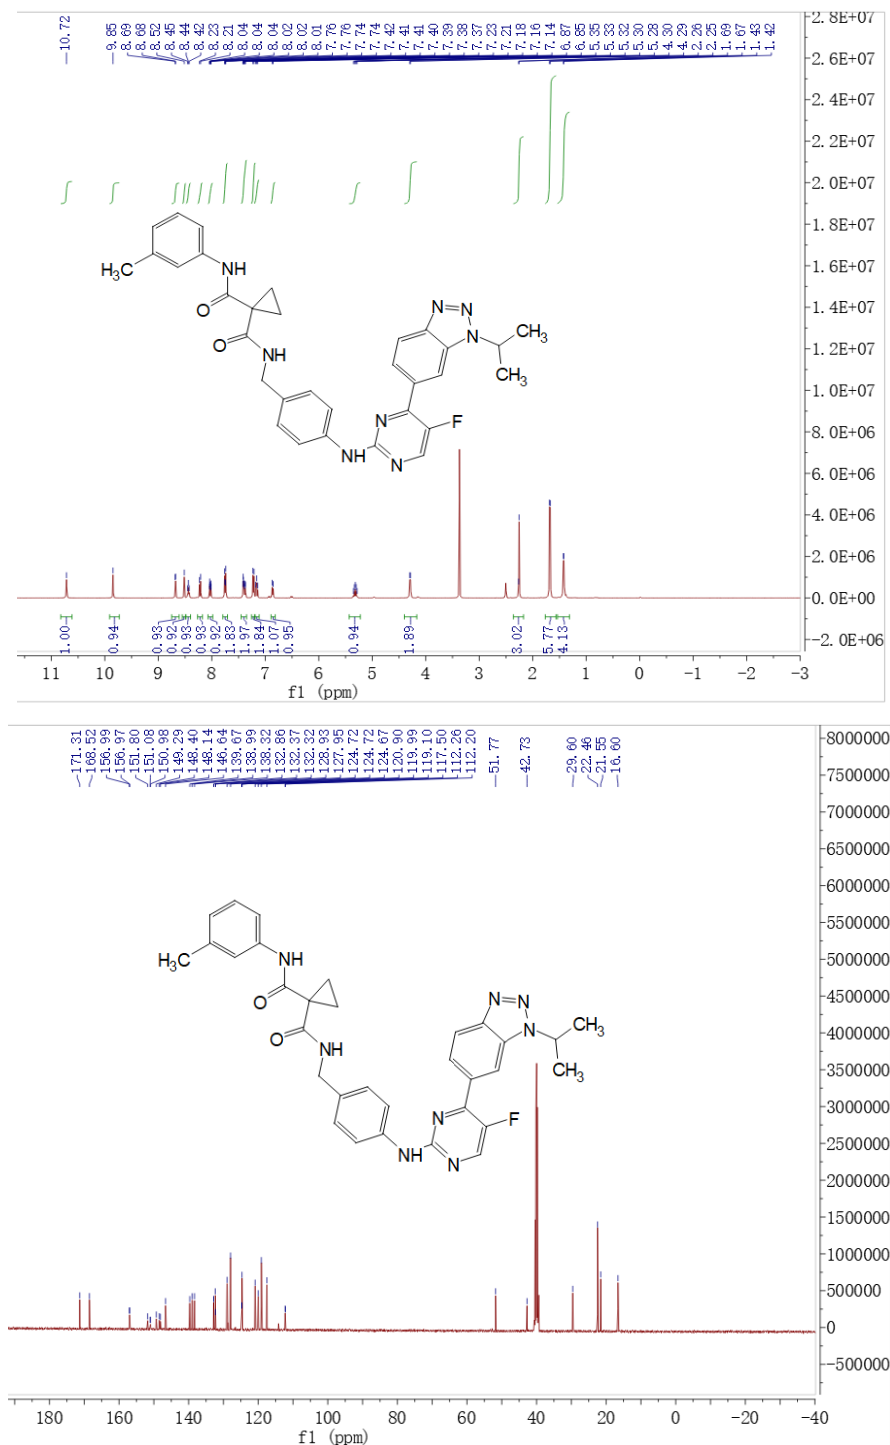

Figure S13.  $^1\text{H}$  and  $^{13}\text{C}$  spectra of compound 12J.

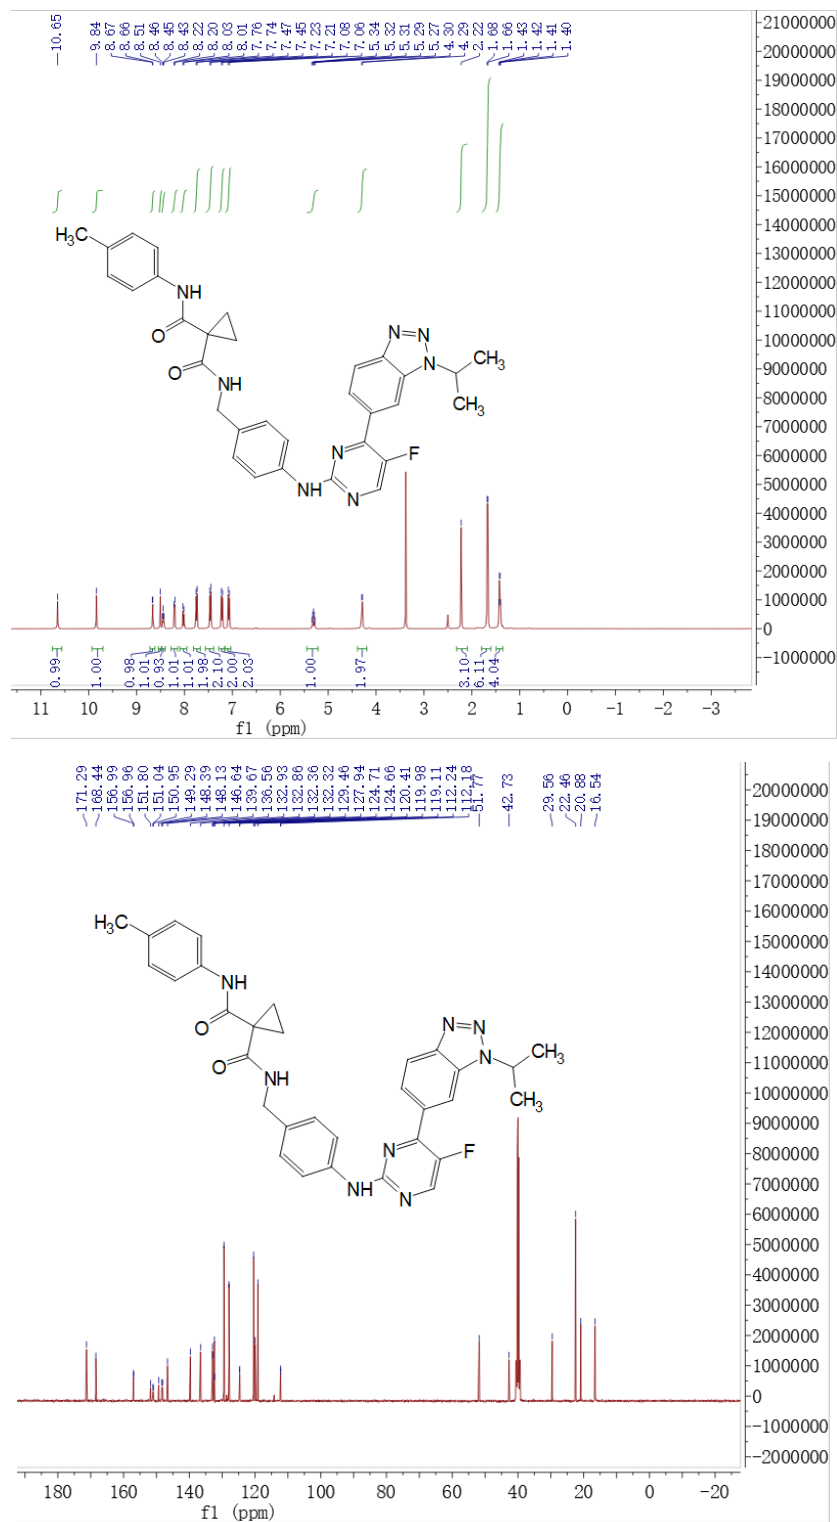



Figure S14.  $^1\text{H}$  and  $^{13}\text{C}$  spectra of compound 12K.

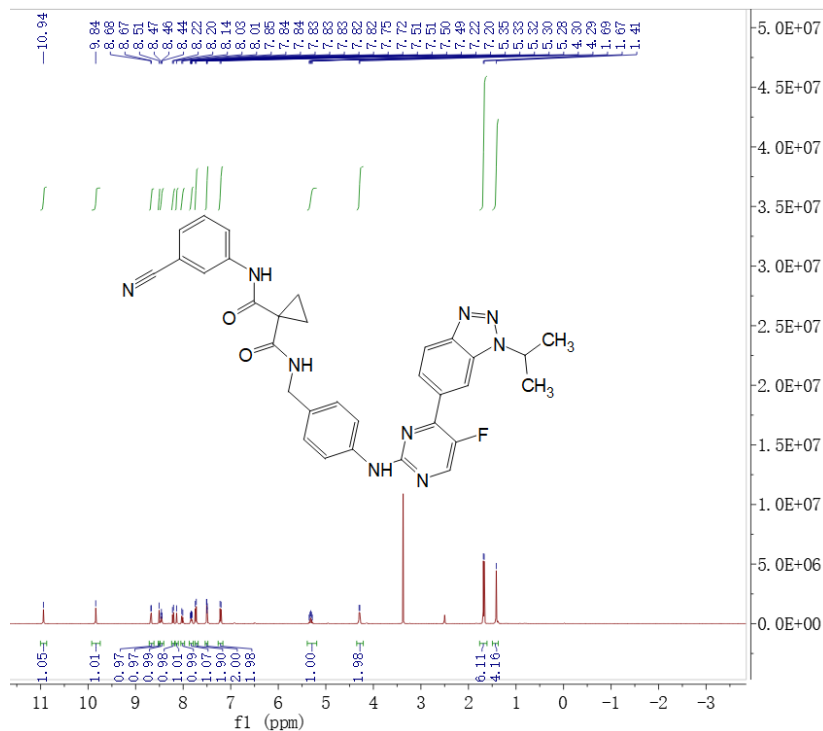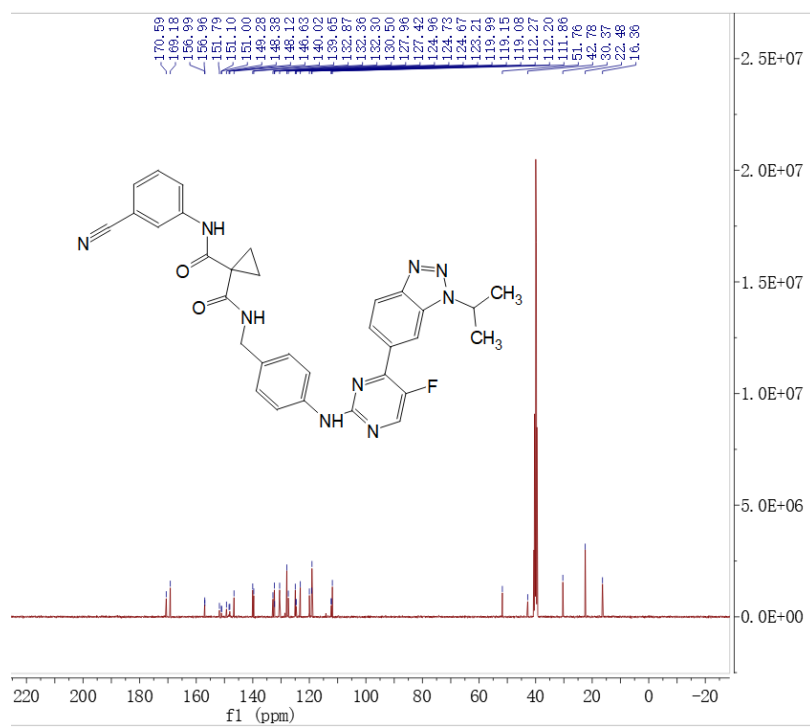

Figure S15.  $^1\text{H}$  and  $^{13}\text{C}$  spectra of compound 12L.

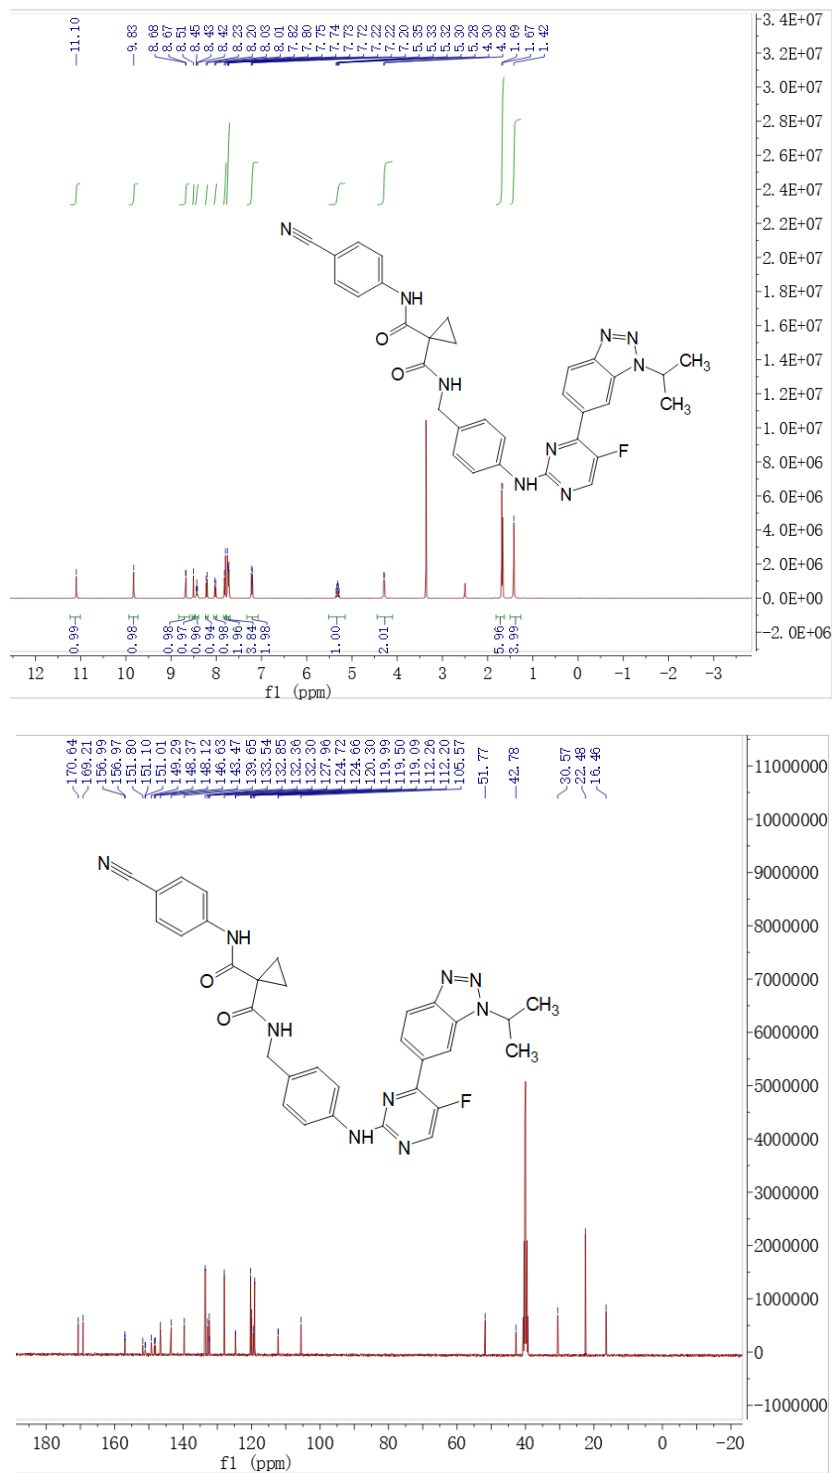

Figure S16.  $^1\text{H}$  and  $^{13}\text{C}$  spectra of compound 12M.

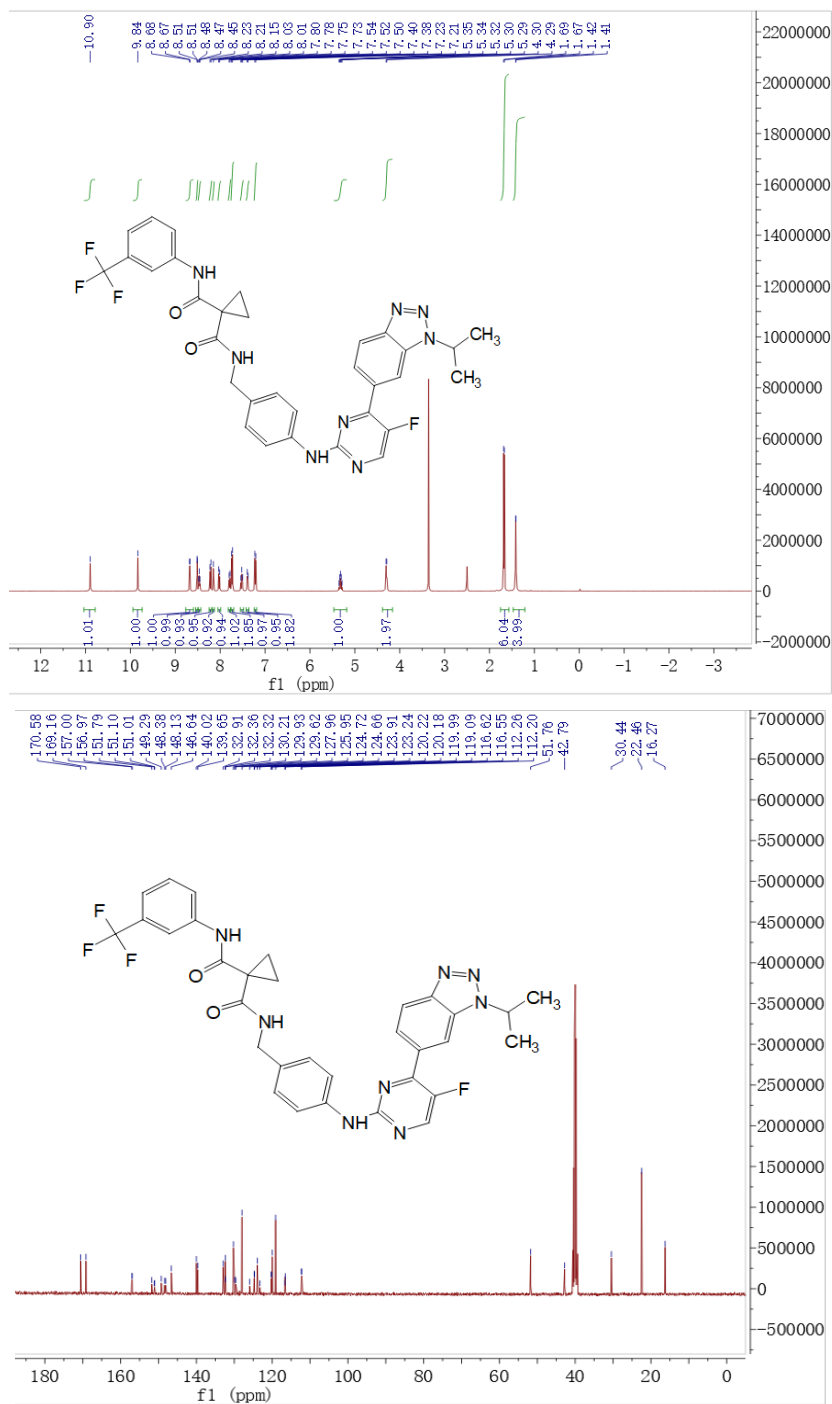

Figure S17.  $^1\text{H}$  and  $^{13}\text{C}$  spectra of compound 12N.

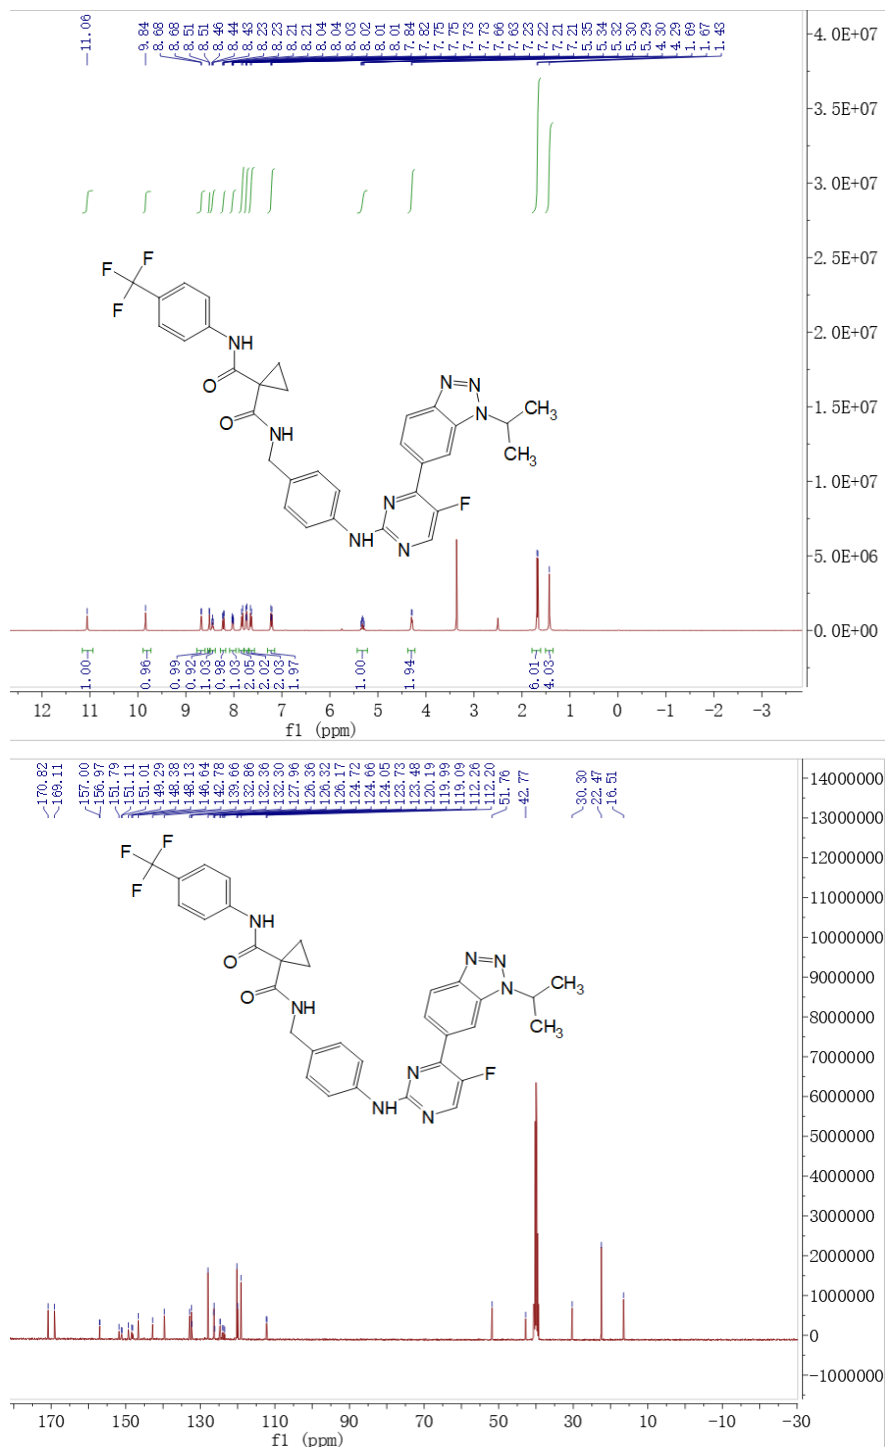

Supplement: s1 [file s1]
